# Supplementary material
Source: MDPI journal article supplement (https://www.mdpi.com/2073-4344/5/1/424)
Supplement: s1 [file s1]

# Supplementary Information

**Table S1.** Guaiacol upgrading in an aqueous environment over different catalysts <sup>a</sup>.

| Catalyst    | Guaiacol conversion (%) | Selectivity to catechol (%) | Selectivity to phenol (%) | Gravimetric mass balance <sup>b</sup> (%) |
|-------------|-------------------------|-----------------------------|---------------------------|-------------------------------------------|
| AC          | 22                      | 44                          | 1                         | 96                                        |
| 7.5% Ac/AC  | 36                      | 34                          | 5                         | 93                                        |
| 20% Ac/AC   | N.M.                    | N.M.                        | N.M.                      | N.M.                                      |
| 7.5% Am/AC  | 47                      | 34                          | 6                         | 92                                        |
| 20% Am/AC   | 63                      | 25                          | 4                         | 77                                        |
| CNF         | 31                      | 27                          | 1                         | 98                                        |
| 7.5% Ac/CNF | 31                      | 39                          | 2                         | 99                                        |
| 20% Ac/CNF  | 29                      | 47                          | 3                         | 99                                        |
| 7.5% Am/CNF | 25                      | 49                          | 4                         | 99                                        |
| 20% Am/CNF  | 24                      | 54                          | 7                         | 96                                        |
| CNT         | 54                      | 29                          | 2                         | 92                                        |
| 7.5% Ac/CNT | 51                      | 18                          | 1                         | 74                                        |
| 20% Ac/CNT  | 41                      | 17                          | 0                         | 91                                        |
| 7.5% Am/CNT | 44                      | 15                          | 1                         | 86                                        |
| 20% Am/CNT  | 58                      | 12                          | 1                         | 81                                        |

<sup>a</sup> Reaction conditions: 0.125 g catalyst, 1.25 g guaiacol, 11.25 g water, 300 °C, 2000 psi of H<sub>2</sub>, 4 h.

<sup>b</sup> Gravimetric mass balance =  $100 \times (\text{mass of starting reaction mixture})/(\text{mass of recovered liquids and solids})$ . N.M.: not measured.

**Table S2.** Product distribution of guaiacol upgrading experiments performed in dodecane over different catalysts <sup>a</sup>.

| Catalyst    | Unconverted guaiacol (mg) | Cyclohexane (mg) | Cyclohexanone (mg) | Cyclohexanol (mg) | 2-methoxy cyclohexanol (mg) | Cyclohexanediol (mg) | Phenol (mg) | Catechol (mg) | Coke (mg) <sup>b</sup> |
|-------------|---------------------------|------------------|--------------------|-------------------|-----------------------------|----------------------|-------------|---------------|------------------------|
| None        | 1166                      | 1                | 0                  | 0                 | 0                           | 0                    | 0           | 19            | 0                      |
| AC          | 1109                      | 1                | 0                  | 3                 | <1                          | 1                    | 5           | 21            | 155                    |
| 7.5% Ac/AC  | 943                       | 2                | 0                  | 4                 | 1                           | 7                    | 40          | 69            | N/A                    |
| 20% Ac/AC   | 493                       | 3                | 0                  | 4                 | 1                           | 7                    | 69          | 52            | 45                     |
| 7.5% Am/AC  | 794                       | 26               | 0                  | 5                 | 16                          | 4                    | 5           | 95            | N/A                    |
| 20% Am/AC   | 583                       | 9                | 0                  | 4                 | 1                           | 1                    | 17          | 203           | N/A                    |
| CNF         | 1187                      | 0                | 0                  | 2                 | 0                           | 0                    | 2           | 19            | N/A                    |
| 7.5% Ac/CNF | 754                       | 0                | 0                  | 3                 | 1                           | 5                    | 61          | 53            | 5                      |
| 20% Ac/CNF  | 558                       | 0                | 0                  | 0                 | 0                           | 5                    | 246         | 85            | N/A                    |
| 7.5% Am/CNF | 841                       | 0                | 0                  | 3                 | 0                           | 7                    | 161         | 55            | N/A                    |
| 20% Am/CNF  | 589                       | 0                | 0                  | 6                 | 0                           | 5                    | 245         | 104           | 5                      |
| CNT         | 1056                      | 1                | 0                  | 3                 | <1                          | 1                    | 4           | 31            | 205                    |
| 7.5% Ac/CNT | 351                       | 0                | 0                  | 2                 | 0                           | 2                    | 25          | 322           | 315                    |
| 20% Ac/CNT  | 119                       | 82               | 0                  | 4                 | 7                           | 9                    | 57          | 280           | 305                    |
| 7.5% Am/CNT | 855                       | 0                | 0                  | 3                 | 0                           | 2                    | 14          | 188           | N/A                    |
| 20% Am/CNT  | 946                       | 1                | 0                  | 2                 | 0                           | 4                    | 111         | 39            | 65                     |

<sup>a</sup> Reaction conditions: 0.125 g catalyst, 1.25 g guaiacol, 11.25 g dodecane, 300 °C, 580 psi of H<sub>2</sub>, 4 h. <sup>b</sup> Defined as the weight of catalyst added to the reactor subtracted from the weight of recovered solids. Note: in cells marked "N/A" the aforementioned subtraction afforded a slightly negative number, which suggests that the recovery of solids was incomplete and was taken as an indication of negligible coke formation.

**Table S3.** Product distribution of guaiacol upgrading experiments performed in dodecane at 350 °C <sup>a</sup>.

| Catalyst    | Unconverted guaiacol (mg) | Cyclohexane (mg) | Cyclohexanone (mg) | Cyclohexanol (mg) | 2-methoxy cyclohexanol (mg) | Cyclohexanediol (mg) | Phenol (mg) | Catechol (mg) | Coke (mg) <sup>b</sup> |
|-------------|---------------------------|------------------|--------------------|-------------------|-----------------------------|----------------------|-------------|---------------|------------------------|
| None        | 266                       | 1                | 0                  | 2                 | 3                           | 4                    | 15          | 47            | 0                      |
| 7.5% Am/CNF | 7                         | 29               | 0                  | 6                 | 3                           | 2                    | 607         | 1             | 65                     |
| 20% Am/CNF  | 23                        | 13               | 0                  | 6                 | 3                           | 1                    | 596         | 1             | 65                     |

<sup>a</sup> Reaction conditions: 0.125 g catalyst, 1.25 g guaiacol, 11.25 g dodecane, 350 °C, 580 psi of H<sub>2</sub>, 4 h.

<sup>b</sup> Defined as the weight of catalyst added to the reactor subtracted from the weight of recovered solids.

**Table S4.** Molar mass balance showing weight of possible high molecular weight products <sup>a</sup>.

| Catalyst     | Unconverted guaiacol (mmol) | Cyclohexane (mmol) | Cyclohexanone (mmol) | Cyclohexanol (mmol) | 2-methoxy cyclohexanol (mmol) | Cyclohexanediol (mmol) | Phenol (mmol) | Catechol (mmol) | Coke (mg) <sup>b</sup> | Unidentifiable and/or undetectable products (mg) <sup>c</sup> |
|--------------|-----------------------------|--------------------|----------------------|---------------------|-------------------------------|------------------------|---------------|-----------------|------------------------|---------------------------------------------------------------|
| None         | 9.392                       | 0.011              | 0                    | 0                   | 0                             | 0                      | 0             | 0.172           | 0                      | 61.10                                                         |
| None*        | 2.143                       | 0.011              | 0                    | 0.019               | 0.023                         | 0.034                  | 0.159         | 0.426           | 0                      | 900.1                                                         |
| AC           | 8.933                       | 0.011              | 0                    | 0.029               | 0.007                         | 0.008                  | 0.053         | 0.190           | 155                    | 113.3                                                         |
| 7.5% Ac/AC   | 7.596                       | 0.023              | 0                    | 0.039               | 0.007                         | 0.060                  | 0.425         | 0.626           | N/A                    | 180.0                                                         |
| 20% Ac/AC    | 3.971                       | 0.035              | 0                    | 0.039               | 0.007                         | 0.060                  | 0.733         | 0.472           | 45                     | 609.4                                                         |
| 7.5% Am/AC   | 6.396                       | 0.308              | 0                    | 0.049               | 0.122                         | 0.034                  | 0.053         | 0.862           | N/A                    | 288.2                                                         |
| 20% Am/AC    | 4.696                       | 0.106              | 0                    | 0.039               | 0.007                         | 0.008                  | 0.180         | 1.843           | N/A                    | 395.4                                                         |
| CNF          | 9.561                       | 0                  | 0                    | 0.019               | 0                             | 0                      | 0.021         | 0.172           | N/A                    | 46.46                                                         |
| 7.5% Ac/CNF  | 6.073                       | 0                  | 0                    | 0.029               | 0.007                         | 0.043                  | 0.648         | 0.481           | 5                      | 345.7                                                         |
| 20% Ac/CNF   | 4.494                       | 0                  | 0                    | 0                   | 0                             | 0.043                  | 2.613         | 0.772           | N/A                    | 286.3                                                         |
| 7.5% Am/CNF  | 6.774                       | 0                  | 0                    | 0.029               | 0                             | 0.060                  | 1.710         | 0.499           | N/A                    | 133.4                                                         |
| 7.5% Am/CNF* | 0.056                       | 0.344              | 0                    | 0.059               | 0.023                         | 0.017                  | 6.449         | 0.009           | 65                     | 385.9                                                         |
| 20% Am/CNF   | 4.744                       | 0                  | 0                    | 0.059               | 0                             | 0.043                  | 2.603         | 0.944           | 5                      | 207.7                                                         |
| 20% Am/CNF*  | 0.185                       | 0.154              | 0                    | 0.059               | 0.023                         | 0.008                  | 6.333         | 0.009           | 65                     | 419.0                                                         |
| CNT          | 8.506                       | 0.011              | 0                    | 0.029               | 0.007                         | 0.008                  | 0.042         | 0.281           | 205                    | 156.3                                                         |
| 7.5% Ac/CNT  | 2.827                       | 0                  | 0                    | 0.019               | 0                             | 0.017                  | 0.265         | 2.924           | 315                    | 498.0                                                         |
| 20% Ac/CNT   | 0.958                       | 0.974              | 0                    | 0.039               | 0.053                         | 0.077                  | 0.605         | 2.543           | 305                    | 607.5                                                         |
| 7.5% Am/CNT  | 6.887                       | 0                  | 0                    | 0.029               | 0                             | 0.017                  | 0.148         | 1.707           | N/A                    | 178.7                                                         |
| 20% Am/CNT   | 7.620                       | 0.011              | 0                    | 0.019               | 0                             | 0.034                  | 1.179         | 0.354           | 65                     | 105.3                                                         |

<sup>a</sup> Reaction conditions: 0.125 g catalyst, 0.43 g guaiacol, 0.43 g acetic acid, 0.44 g furfural, 11.25 g dodecane, 300 °C (unless otherwise indicated), 580 psi of H<sub>2</sub>, 4 h. <sup>b</sup> Defined as the weight of catalyst added to the reactor subtracted from the weight of recovered solids. Note: in cells marked “N/A” the aforementioned subtraction afforded a slightly negative number, which suggests that the recovery of solids was incomplete and was taken as an indication of negligible coke formation. <sup>c</sup> Defined as the quantity of guaiacol which was not identified as unconverted starting material, products, or coke. If N/A appears in the coke column, coke was assumed to be zero. \*Indicates reactions carried out at 350 °C.

**Table S5.** Sequential guaiacol upgrading runs in dodecane over 20%Am/CNF <sup>a</sup>.

| Run | Unconverted guaiacol (mg) | Cyclohexane (mg) | Cyclohexanone (mg) | Cyclohexanol (mg) | 2-methoxy cyclohexanol (mg) | Cyclohexanediol (mg) | Phenol (mg) | Catechol (mg) | Coke (mg) <sup>b</sup> |
|-----|---------------------------|------------------|--------------------|-------------------|-----------------------------|----------------------|-------------|---------------|------------------------|
| 1   | 301                       | 7                | 0                  | 3                 | 1                           | 11                   | 474         | 17            | 55                     |
| 2   | 467                       | 1                | 0                  | 2                 | 0                           | 1                    | 280         | 26            | 5                      |
| 3   | 546                       | 0                | 0                  | 2                 | 0                           | 3                    | 225         | 32            | N/A                    |

<sup>a</sup> Reaction conditions: 300 °C, 580 psi of H<sub>2</sub>, 4 h. Run 1: 0.125 g catalyst, 1.25 g guaiacol, 11.25 g dodecane; Run 2: 0.125 g catalyst, 1.25 g guaiacol, 11.25 g dodecane; Run 3: 0.117 g catalyst, 1.17 g guaiacol, 10.53 g dodecane. <sup>b</sup> Defined as the weight of catalyst added to the reactor subtracted from the weight of recovered solids. Note: in cells marked “N/A” the aforementioned subtraction afforded a slightly negative number, which suggests that the recovery of solids was incomplete and was taken as an indication of negligible coke formation.

**Table S6.** Product distribution of guaiacol upgrading in the presence of acetic acid and furfural <sup>a</sup>.

| Catalyst   | Unconverted guaiacol (mg) | Unconverted acetic acid (mg) | Unconverted furfural (mg) | Cyclohexanol (mg) | Phenol (mg) | Catechol (mg) | Ethyl acetate (mg) | Tetrahydrofurfuryl alcohol (mg) | $\gamma$ -butyrolactone (mg) | Coke (mg) <sup>b</sup> |
|------------|---------------------------|------------------------------|---------------------------|-------------------|-------------|---------------|--------------------|---------------------------------|------------------------------|------------------------|
| 20% Am/CNF | 403                       | 139                          | 89                        | 1                 | 17          | 6             | 4                  | 1                               | 2                            | 165                    |

<sup>a</sup> Reaction conditions: 0.125 g catalyst, 0.43 g guaiacol, 0.43 g acetic acid, 0.44 g furfural, 11.25 g dodecane, 300 °C, 580 psi of H<sub>2</sub>, 4 h. <sup>b</sup> Defined as the weight of catalyst added to the reactor subtracted from the weight of recovered solids.

**Table S7.** Calibration solution composition, retention times and response factors.

| Constituent                | Retention time | Response factor   | Calibration solutions (g) |       |       |       |       |
|----------------------------|----------------|-------------------|---------------------------|-------|-------|-------|-------|
|                            |                |                   | 1                         | 2     | 3     | 4     | 5     |
| Cyclohexane                | 0.5            | 0.83              | 0.00                      | 0.02  | 0.04  | 0.00  | 0.00  |
| Ethyl acetate              | 0.9            | 0.55              | 0.00                      | 0.00  | 0.00  | 0.06  | 0.13  |
| Ethanol                    | 1.0            | N/A*              | 0.00                      | 0.00  | 0.00  | 0.06  | 0.13  |
| Cyclopentanone             | 3.4            | 1.13              | 0.00                      | 0.00  | 0.00  | 0.00  | 0.01  |
| Cyclohexanone              | 5.4            | 1.34              | 0.00                      | 0.01  | 0.00  | 0.00  | 0.00  |
| Cyclopentanol              | 6.2            | 1.11              | 0.00                      | 0.00  | 0.00  | 0.03  | 0.05  |
| Cyclohexanol               | 8.2            | 1.18              | 0.00                      | 0.01  | 0.01  | 0.00  | 0.00  |
| Acetic acid                | 8.6            | 0.36              | 0.00                      | 0.00  | 0.00  | 0.50  | 0.19  |
| Furfural                   | 9.0            | 0.68              | 0.00                      | 0.00  | 0.10  | 0.50  | 0.19  |
| Tetrahydrofurfuryl alcohol | 9.6            | 0.77              | 0.00                      | 0.00  | 0.00  | 0.00  | 0.01  |
| 2-methoxycyclohexanol      | 9.8            | 0.92              | 0.00                      | 0.01  | 0.01  | 0.00  | 0.00  |
| $\gamma$ -butyrolactone    | 11.1           | 1.02              | 0.00                      | 0.00  | 0.00  | 0.01  | 0.01  |
| 1,2-pentanediol            | 13.1           | 0.73              | 0.00                      | 0.00  | 0.00  | 0.00  | 0.01  |
| Guaiacol                   | 13.8           | 1.09              | 1.26                      | 0.95  | 0.25  | 0.06  | 0.50  |
| 1,2-cyclohexanediols       | 14.5           | 1.10              | 0.00                      | 0.01  | 0.01  | 0.00  | 0.00  |
| Phenol                     | 15.2           | 1.28              | 0.00                      | 0.25  | 0.76  | 0.00  | 0.00  |
| Levulinic acid             | 18.1           | 0.58              | 0.00                      | 0.00  | 0.00  | 0.02  | 0.04  |
| Catechol                   | 20.8           | 0.97              | 0.00                      | 0.02  | 0.08  | 0.00  | 0.00  |
| Sec-butanol                | 1.6            | Internal Standard | 1.21                      | 1.21  | 1.21  | 1.21  | 1.21  |
| Chloroform                 |                | Solvent           | 11.25                     | 11.25 | 11.25 | 11.25 | 11.25 |

\*A response factor for ethanol could not be determined. Chloroform (stabilized with ethanol) was used as a solvent and thus interferes with the ethanol product signal.

© 2015 by the authors; licensee MDPI, Basel, Switzerland. This article is an open access article distributed under the terms and conditions of the Creative Commons Attribution license (<http://creativecommons.org/licenses/by/4.0/>).
